# Supplementary material for: High-resolution modeling of tsunami run-up flooding: A case study of flooding in Kamaishi City, Japan, induced by the 2011 Tohoku Tsunami
Source: Copernicus journal article supplement (doi:10.5194/nhess-2017-222), 2017-07-04
Supplement: Supplementary file [file nhess-2017-222-AC1-supplement.pdf]

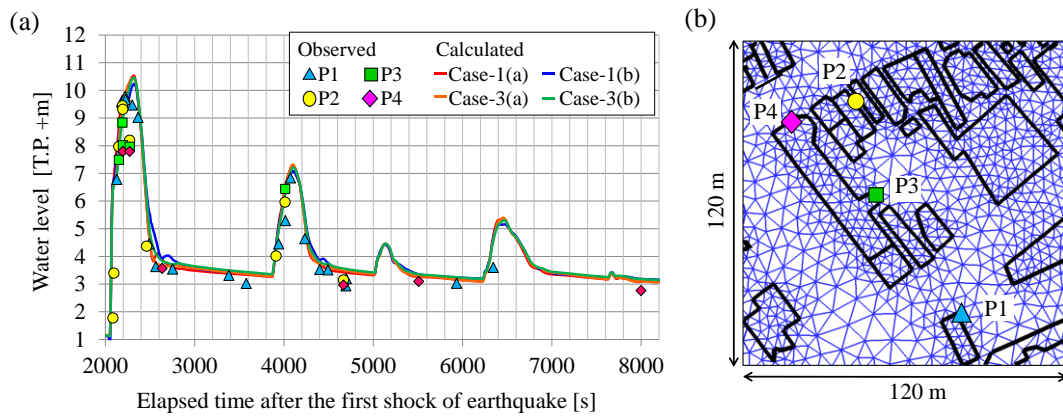

Fig. 14: Time series of water surface displacement near the coast:  
 comparison between (a) measured and (b) calculated  
 target points for photograph analysis.

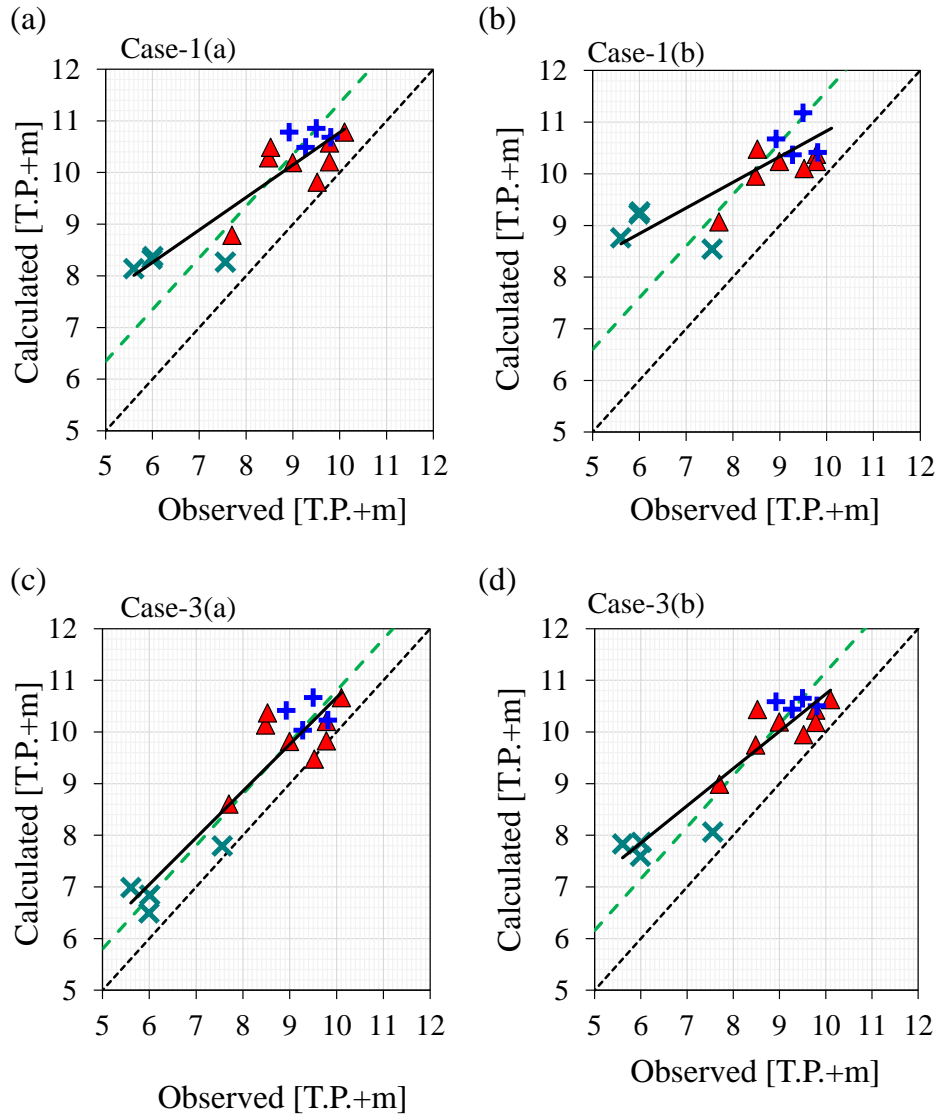

Fig. 15: Comparison between calculated and measured maximum heights. Symbols are the same as those used for Fig. 11:

- (a) Case-1(a) –  $C=0.0$ , buildings before tsunami;
- (b) Case-1(b) –  $C=0.0$ , buildings after tsunami;
- (c) Case-3(a) –  $C=0.01$ , buildings before tsunami;
- (d) Case-3(b) –  $C=0.01$ , buildings after tsunami.

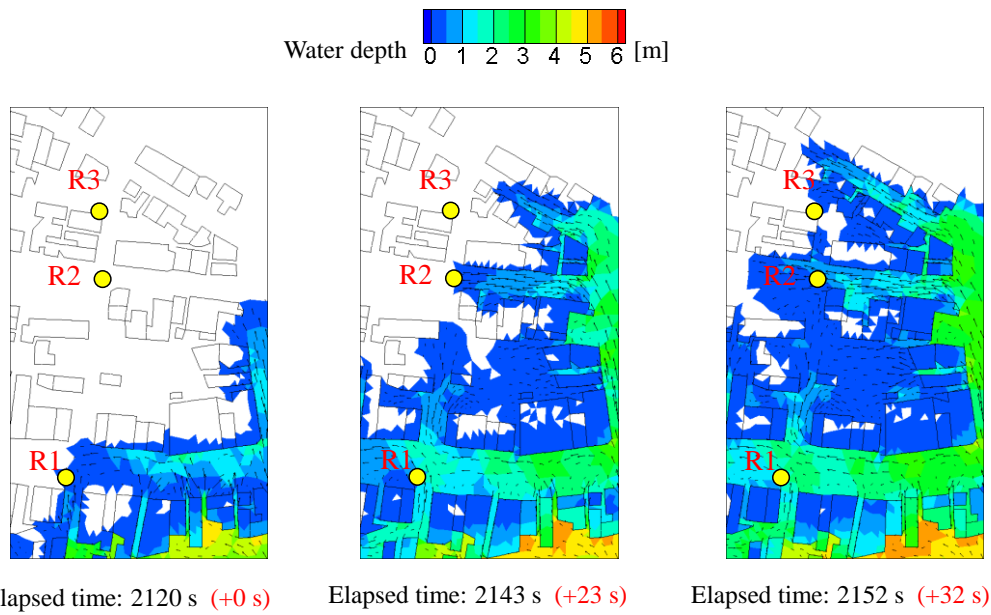

Fig. 16: Calculated wavefront propagation corresponding to the measured values in Fig. 13.

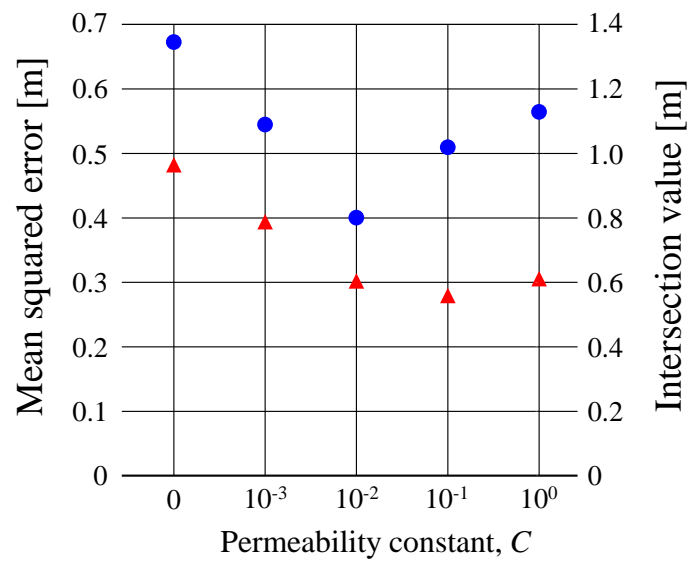

Fig. 17: Degree of regression by 1:1 slope line:

▲, mean squared error; ●, intersection value (difference from perfect agreement).

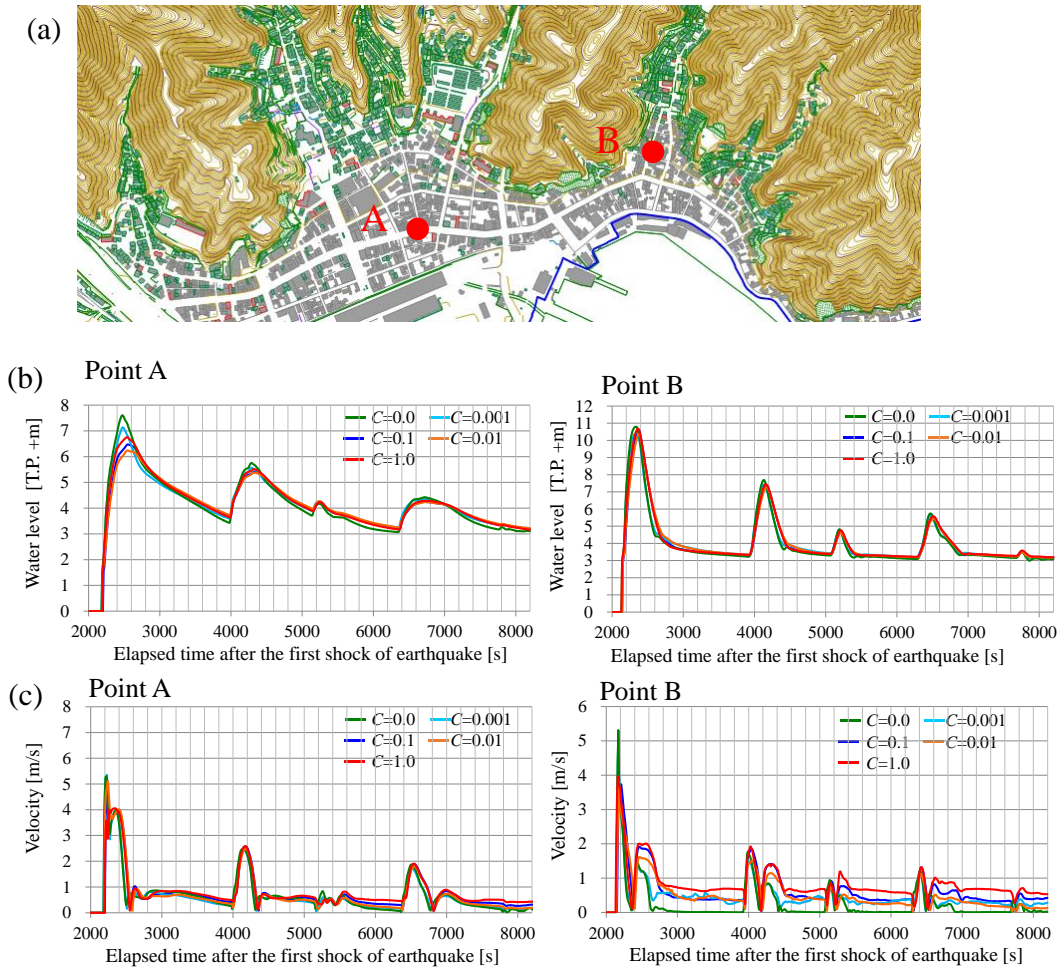

Fig. 18: Time series of flow variables at the city center:  
 (a) examination point, (b) water depth, and (c) flow velocity.

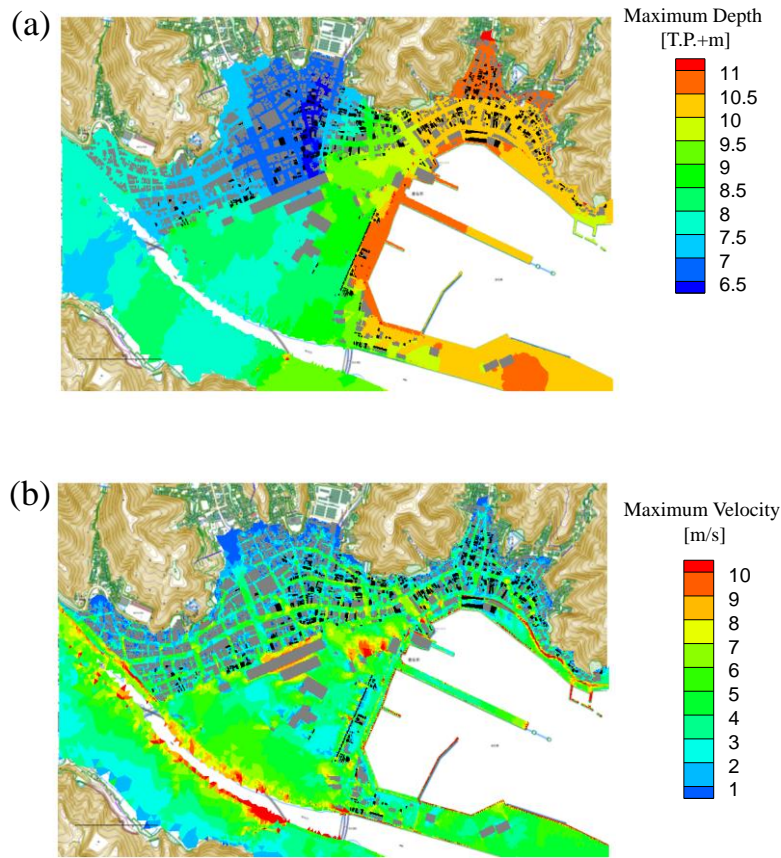

Fig. 19: Mappings of maximum depth and maximum flow velocity during flooding (Case-3(a)):  
 (a) maximum depth and (b) maximum velocity.

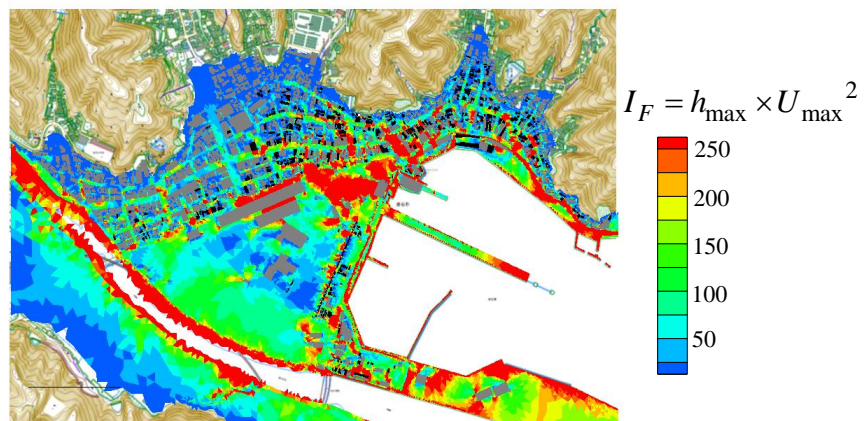

Fig. 20: Z-value mapping for the original building array ( $C = 0.01$ ).

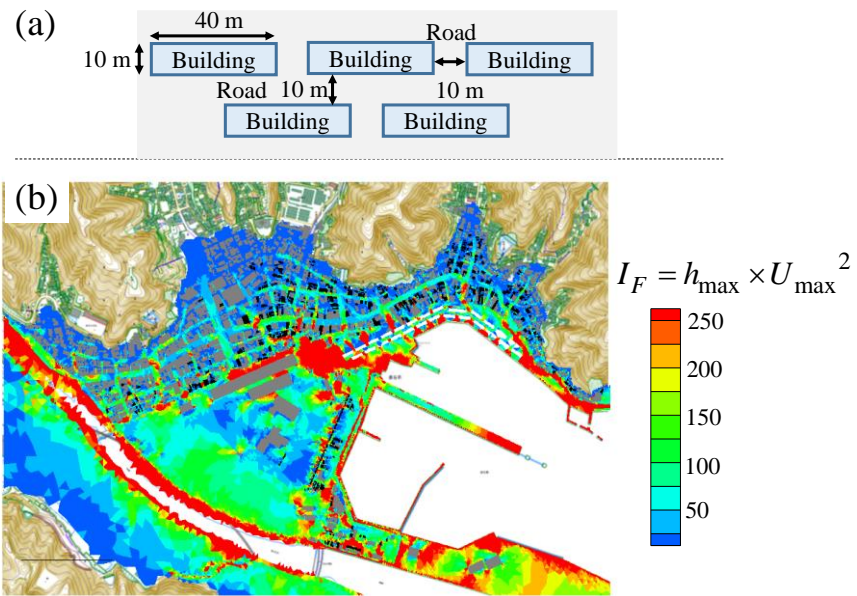

Fig. 21: Z-value mapping for the testing building plot ( $C = 0.01$ ):  
 (a) building plot and (b) Z-value mapping.
